# Supplementary material for: Multimodal imaging of the distal interphalangeal-joint synovio-entheseal complex in psoriatic arthritis (MIDAS): a cross-sectional study on the diagnostic accuracy of different imaging modalities comparing psoriatic arthritis to psoriasis and osteoarthritis
Source: HighWire-hosted journal article supplement (doi:10.1136/rmdopen-2021-002109), 2022-03-01
Supplement: rmdopen-2021-002109supp002_data_supplement.pdf [file rmdopen-2021-002109supp002_data_supplement.pdf]

## Supplement 2

## Eligibility criteria

|                                                                                                                                                                                                                                                                                                                                                                                                                                                                                                                                                                                                                                                                                                                                                           |
|-----------------------------------------------------------------------------------------------------------------------------------------------------------------------------------------------------------------------------------------------------------------------------------------------------------------------------------------------------------------------------------------------------------------------------------------------------------------------------------------------------------------------------------------------------------------------------------------------------------------------------------------------------------------------------------------------------------------------------------------------------------|
| <p><b>Criteria for inclusion Psoriatic arthritis:</b></p> <ul style="list-style-type: none"><li>• <math>\geq 18</math> years old and under 85 years</li><li>• Able to understand, read and speak Danish</li><li>• Diagnosed with psoriatic arthritis according to the CASPAR criteria</li><li>• DIP-joint arthralgia and/or arthritis (when 1 of the following features are present: swelling, tenderness, and decreased range of motion)</li><li>• Modified nail psoriasis severity index (mNAPSI) of <math>\geq 5</math></li></ul>                                                                                                                                                                                                                      |
| <p><b>Criteria for exclusion psoriatic arthritis:</b></p> <ul style="list-style-type: none"><li>• Absence of consent</li><li>• Heberden osteoarthritis</li><li>• Pregnancy</li><li>• Reduced kidney function expressed as an estimated glomerular filtration rate (eGFR) <math>&lt; 60</math> ml/min/1.73m<sup>2</sup> or history of chronic kidney failure.</li><li>• Other inflammatory rheumatic diseases such as rheumatoid arthritis, gout or CPPD</li><li>• Treatment with oral, intra-articular or intra-muscular glucocorticoids within the past 3 weeks</li><li>• Treatment with mild analgesics (non-steroidal anti-inflammatory drugs, acetylsalicylic acid, acetaminophen) 24 hours before assessment</li></ul>                               |
| <p><b>Criteria for inclusion psoriasis Vulgaris:</b></p> <ul style="list-style-type: none"><li>• <math>\geq 18</math> years old and under 85 years</li><li>• Able to understand, read and speak Danish</li><li>• Diagnosed with psoriasis Vulgaris by a dermatologist</li><li>• Modified nail psoriasis severity index (mNAPSI) of <math>\geq 5</math></li></ul>                                                                                                                                                                                                                                                                                                                                                                                          |
| <p><b>Criteria for exclusion psoriasis Vulgaris:</b></p> <ul style="list-style-type: none"><li>• Absence of consent</li><li>• Heberden osteoarthritis</li><li>• Pregnancy</li><li>• Reduced kidney function expressed as an estimated glomerular filtration rate (eGFR) <math>&lt; 60</math> ml/min/1.73m<sup>2</sup> or history of chronic kidney failure.</li><li>• Inflammatory rheumatic diseases such as psoriatic arthritis, osteoarthritis, rheumatoid arthritis, gout or CPPD</li><li>• Treatment with oral, intra-articular or intra-muscular glucocorticoids within the past 3 weeks</li><li>• Treatment with mild analgesics (non-steroidal anti-inflammatory drugs, acetylsalicylic acid, acetaminophen) 24 hours before assessment</li></ul> |

**Criteria for inclusion osteoarthritis:**

- ≥ 18 years old and under 85 years
- Able to understand, read and speak Danish
- Diagnosed with osteoarthritis by a physician
- DIP-joint arthralgia and/or arthritis (when 1 of the following features are present: swelling, tenderness, and decreased range of motion)

**Criteria for exclusion osteoarthritis:**

- Absence of consent
- Pregnancy
- Reduced kidney function expressed as an estimated glomerular filtration rate (eGFR) < 60 ml/min/1.73m<sup>2</sup> or history of chronic kidney failure.
- Other inflammatory rheumatic diseases such as psoriatic arthritis, rheumatoid arthritis, gout or CPPD
- Treatment with oral, intra-articular or intra-muscular glucocorticoids within the past 3 weeks
- Treatment with mild analgesics (non-steroidal anti-inflammatory drugs, acetylsalicylic acid, acetaminophen) 24 hours before assessment
