# Supplementary material for: Multimodal imaging of the distal interphalangeal-joint synovio-entheseal complex in psoriatic arthritis (MIDAS): a cross-sectional study on the diagnostic accuracy of different imaging modalities comparing psoriatic arthritis to psoriasis and osteoarthritis
Source: HighWire-hosted journal article supplement (doi:10.1136/rmdopen-2021-002109), 2022-03-01
Supplement: rmdopen-2021-002109supp006_data_supplement.pdf [file rmdopen-2021-002109supp006_data_supplement.pdf]

## Supplements 6

## X-ray protocol [1]

|                   | <b>Score</b> | <b>Definition</b>                                                           |
|-------------------|--------------|-----------------------------------------------------------------------------|
| <b>Enthesitis</b> | 0            | No bony changes at the collateral ligament attachments                      |
|                   | 1            | any subperiosteal bone resorption or sclerosis and/or cortical irregularity |
|                   | 2            | Tiny or small new bone formation                                            |
|                   | 3            | Moderate size/Large new bone formation                                      |
| <b>Erosions</b>   | 0            | None                                                                        |
|                   | 1            | Cortical irregularity - dip                                                 |
|                   | 2            | Tiny/small                                                                  |
|                   | 3            | Large                                                                       |

Morphology score

Total X-ray enthesal score 0-3.

Total X-ray erosion score 0-3.

Total X-ray joint score = X-ray enthesal score + X-ray erosion score 0-6.

## References

1. Zavareh A et al. Rheumatology. 04 vol. 57;Iss. Suppl\_3. 2018
