# Supplementary material for: Multimodal imaging of the distal interphalangeal-joint synovio-entheseal complex in psoriatic arthritis (MIDAS): a cross-sectional study on the diagnostic accuracy of different imaging modalities comparing psoriatic arthritis to psoriasis and osteoarthritis
Source: HighWire-hosted journal article supplement (doi:10.1136/rmdopen-2021-002109), 2022-03-01
Supplement: rmdopen-2021-002109supp007_data_supplement.pdf [file rmdopen-2021-002109supp007_data_supplement.pdf]

## Supplements 7

Intraclass correlation coefficients (ICC) and weighted Kappa tables

| <b>US measure</b>                   | <b>Intraclass Correlation Coefficient</b> | <b>CI 95 %</b> |
|-------------------------------------|-------------------------------------------|----------------|
| <b>US extensor tendon thickness</b> | 0.64                                      | 0,46 to 0,76   |
| <b>US Flexor tendon thickness</b>   | 0.72                                      | 0.59 to 0.81   |
| <b>US nail matrix thickness</b>     | 0.73                                      | 0.48 to 0.84   |
| <b>US nail bed thickness</b>        | 0.95                                      | 0.92 to 0.96   |
| <b>US nail thickness</b>            | 0.81                                      | 0.71 to 0.87   |

| <b>US measure</b>                    | <b>Weighted Kappa (standard error)</b> |
|--------------------------------------|----------------------------------------|
| <b>US synovitis</b>                  | 0.76 (0.07)                            |
| <b>US Doppler</b>                    | not estimable                          |
| <b>US erosions</b>                   | 0.92 (0.08)                            |
| <b>US new bone formation</b>         | 0.80 (0.06)                            |
| <b>US extensor Tendon enthesitis</b> | 0.73 (0.07)                            |

### Evaluation

ICC and weighted Kappa values below 0.20 were considered poor, 0.21 to 0.40 fair, 0.41 to 0.60 moderate, 0.61 to 0.80 good, and 0.81 to 1.00 very good.[1]

### References

1. Altman DG: Practical Statistics for Medical Research London:Chapman & Hall/CRC; 1999.
