# Supplementary material for: Multimodal imaging of the distal interphalangeal-joint synovio-entheseal complex in psoriatic arthritis (MIDAS): a cross-sectional study on the diagnostic accuracy of different imaging modalities comparing psoriatic arthritis to psoriasis and osteoarthritis
Source: HighWire-hosted journal article supplement (doi:10.1136/rmdopen-2021-002109), 2022-03-01
Supplement: rmdopen-2021-002109supp008_data_supplement.pdf [file rmdopen-2021-002109supp008_data_supplement.pdf]

## Supplement 8

Sensitivity to diagnosis PsA vs PsO or PsO vs OA according to DCE-MRI flow outcomes and ultrasound flow and scaled measurement outcomes.

|            |                                | AUC (CI 95%)        | Cut-off value | Above cut-off | Above cut-off | AUC (CI 95%)        | Cut-off value | Above cut-off | Above cut-off |
|------------|--------------------------------|---------------------|---------------|---------------|---------------|---------------------|---------------|---------------|---------------|
|            |                                | PsA vs. PsO         | Full group    | PsA           | PsO           | PsA vs OA           | Full group    | PsA           | OA            |
|            |                                |                     | (n=244)       | (n=200)       | (n=44)        | (n=252)             | (n=252)       | (n=200)       | (n=52)        |
| DCE-MRI    | Flow ME*nVOXEL                 | 0.59 (0.47 to 0.68) | 426.65        | 168 (86 %)^   | 33 (69 %)     | 0.55 (0.47 to 0.63) | 1034.55       | 84 (43 %)^    | 11 (21 %)     |
|            | Flow IRE*nVOXEL                | 0.41 (0.29 to 0.52) | 2.56          | 146 (83 %)*   | 27 (77 %)§    | 0.65 (0.56 to 0.74) | 3.93          | 127 (72 %)*   | 19 (40 %)§    |
| Ultrasound | Extensor tendon thickness (mm) | 0.49 (0.39 to 0.58) | 0.55          | 172 (86 %)    | 35 (73 %)     | 0.48 (0.39 to 0.56) | 0.85          | 23 (12 %)     | 4 (8%)        |
|            | Flexor tendon thickness (mm)   | 0.46 (0.38 to 0.54) | 0.95          | 60 (30 %)     | 10 (23 %)     | 0.44 (0.36 to 0.53) | 1.45          | 5 (3 %)       | 0             |
|            | Nail bed thickness (mm)        | 0.40 (0.31 to 0.49) | 2.15          | 37 (19 %)     | 8 (18 %)      | 0.52 (0.43 to 0.61) | 1.25          | 175 (88 %)    | 40 (77 %)     |
|            | Nail matrix thickness (mm)     | 0.52 (0.43 to 0.62) | 1.65          | 154 (77 %)    | 30 (68 %)     | 0.44 (0.36 to 0.53) | 2.75          | 22 (11 %)     | 1 (2 %)       |
|            | Nail thickness (mm)            | 0.53 (0.42 to 0.63) | 0.65          | 67 (34 %)     | 12 (27 %)     | 0.53 (0.44 to 0.61) | 0.65          | 67 (34 %)     | 13 (25 %)     |
|            | Doppler max ratio              | 0.42 (0.33 to 0.52) | 0.837         | 3 (2 %)‡      | 0             | 0.50 (0.41 to 0.60) | 0.106         | 160 (83 %)‡   | 39 (75 %)     |
|            | Doppler min ratio              | 0.42 (0.32 to 0.51) | 0.488         | 7 (4 %)‡      | 1 (2 %)       | 0.57 (0.48 to 0.66) | 0.022         | 132 (68 %)‡   | 25 (48 %)     |

Abbreviations: DCE-MRI: Dynamic contrast-enhanced magnetic resonance imaging. ME: Maximum enhancement. IRE: Initial rate of enhancement. AUC: Area under the curve. PsA: psoriatic arthritis. PsO: psoriasis. OA: Hand osteoarthritis. Missing: ^: n=4. \*: n=24. §: n=9. #: n=4. ‡: n=6.



Table 3: Indeholder table 7 fra SAP

|                              | PsA<br>(n=200*) | PsO (n=44*)  | OA (n=52*)  | Healthy<br>(n=124*) |  |
|------------------------------|-----------------|--------------|-------------|---------------------|--|
| <b>US-synovitis. n (%)</b>   |                 |              |             |                     |  |
| 0                            | 119<br>(59.5%)  | 31 (64.6 %)  | 20 (39.5 %) | 96 (77.4 %)         |  |
| 1                            | 71 (35.5 %)     | 11 (22.9 %)  | 16 (30.8 %) | 28 (22.6 %)         |  |
| 2                            | 10 (5 %)        | 1 (2.1 %)    | 14 (26.9 %) | 0                   |  |
| 3                            | 0               | 1 (2.1 %)    | 2 (3.8 %)   | 0                   |  |
| <b>US-Doppler. n (%)</b>     |                 |              |             |                     |  |
| 0                            | 196 (98.0 %)    | 44 (100.0 %) | 48 (92.3 %) | 124 (100.0 %)       |  |
| 1                            | 2 (1.0 %)       | 0            | 3 (5.8 %)   | 0                   |  |
| 2                            | 2 (1.0 %)       | 0            | 1 (1.9 %)   | 0                   |  |
| 3                            | 0               | 0            | 0           | 0                   |  |
| <b>US-Erosions. n (%)</b>    |                 |              |             |                     |  |
| 0                            | 178 (89.0 %)    | 42 (95.5 %)  | 47 (90.4 %) | 124 (100.0 %)       |  |
| 1                            | 16 (8.0 %)      | 2 (4.5 %)    | 3 (5.8 %)   | 0                   |  |
| 2                            | 5 (2.5 %)       | 0            | 1 (1.9 %)   | 0                   |  |
| 3                            | 1 (0.5 %)       | 0            | 1 (1.9 %)   | 0                   |  |
| <b>US-Osteophytes. n (%)</b> |                 |              |             |                     |  |
| 0                            | 114 (57 %)      | 31 (70.5 %)  | 6 (11.5 %)  | 119 (96 %)          |  |
| 1                            | 72 (36.9 %)     | 12 (27.3 %)  | 21 (40.4 %) | 5 (4.0 %)           |  |
| 2                            | 11 (5.5 %)      | 1 (2.2 %)    | 20 (38.5 %) | 0                   |  |
| 3                            | 3 (1.5 %)       | 0            | 5 (9.6 %)   | 0                   |  |
| <b>US-AJS score. n (%)</b>   |                 |              |             |                     |  |
| 0                            | 118 (59.0 %)    | 31 (70.4 %)  | 19 (36.5 %) | 96 (77.4 %)         |  |
| 1                            | 69 (34.5 %)     | 11 (25.0 %)  | 16 (30.8 %) | 28 (22.6 %)         |  |
| 2                            | 12 (6.0 %)      | 1 (2.3 %)    | 13 (25.0 %) | 0                   |  |
| 3                            | 0               | 1 (2.3 %)    | 3 (5.8 %)   | 0                   |  |
| 4                            | 1 (0.5 %)       | 0            | 1 (1.9 %)   | 0                   |  |
| 5                            | 0               | 0            | 0           | 0                   |  |

|                                       |              |             |             |              |  |
|---------------------------------------|--------------|-------------|-------------|--------------|--|
| 6                                     | 0            | 0           | 0           | 0            |  |
| US-CJS score. n (%)                   |              |             |             |              |  |
| 0                                     | 109 (54.5 %) | 30 (68.2 %) | 6 (11.5 %)  | 119 (96.0 %) |  |
| 1                                     | 68 (34.0 %)  | 12 (27.3 %) | 18 (34.6 %) | 5 (4.0 %)    |  |
| 2                                     | 11 (5.5 %)   | 2 (4.5 %)   | 20 (38.6 %) | 0            |  |
| 3                                     | 8 (4.0 %)    | 0           | 6 (11.5 %)  | 0            |  |
| 4                                     | 3 (1.5 %)    | 0           | 2 (3.8 %)   | 0            |  |
| 5                                     | 0            | 0           | 0           | 0            |  |
| 6                                     | 1 (0.5 %)    | 0           | 0           | 0            |  |
| *number of joints – 4 per participant |              |             |             |              |  |

Table 3a

|                               | PsA mean (SE) | Diagnosis | Mean (SE)     | Mean difference, mm | CI 95 %         | P-value |
|-------------------------------|---------------|-----------|---------------|---------------------|-----------------|---------|
| US Ext. tendon thickness, mm  | 0,669 (0,013) | OA        | 0,673 (0,025) | -0,004              | -0,059 to 0,051 | 0,88    |
|                               |               | PsO       | 0,682 (0,027) | -0,013              | -0,072 to 0,056 | 0,67    |
|                               |               | Healthy   | 0,567 (0,016) | 0,102               | 0,062 to 0,142  | <0,001  |
| US Flex. Tendon thickness, mm | 0,846 (0,022) | OA        | 0,888 (0,043) | -0,042              | -0,138 to 0,054 | 0,39    |
|                               |               | PsO       | 0,871 (0,047) | -0,025              | -0,128 to 0,079 | 0,64    |
|                               |               | Healthy   | 0,746 (0,029) | 0,101               | 0,029 to 0,173  | 0,007   |
| US nail matrix thickness, mm  | 2,061 (0,055) | OA        | 2,119 (0,107) | -0,058              | -0,297 to 0,181 | 0,630   |
|                               |               | PsO       | 2,016 (0,117) | 0,045               | -0,211 to 0,301 | 0,727   |
|                               |               | Healthy   | 1,871 (0,070) | 0,190               | 0,014 to 0,366  | 0,034   |
| US nail bed thickness, mm     | 1,769 (0,051) | OA        | 1,704 (0,1)   | 0,065               | -0,157 to 0,287 | 0,565   |
|                               |               | PsO       | 1,964 (0,108) | -0,195              | -0,432 to 0,042 | 0,106   |
|                               |               | Healthy   | 1,723 (0,065) | 0,045               | -0,118 to 0,208 | 0,584   |
| US nail thickness, mm         | 0,631 (0,014) | OA        | 0,612 (0,027) | 0,019               | -0,041 to 0,080 | 0,523   |
|                               |               | PsO       | 0,673 (0,029) | -0,042              | -0,106 to 0,023 | 0,202   |
|                               |               | Healthy   | 0,521 (0,018) | 0,110               | 0,066 to 0,154  | <0,001  |
| US flow Max ratio             | 0,329 (0,024) | OA        | 0,338 (0,047) | -0,009              | -0,113 to 0,095 | 0,863   |
|                               |               | PsO       | 0,389 (0,051) | -0,060              | -0,172 to 0,051 | 0,287   |
|                               |               | Healthy   | 0,325 (0,03)  | 0,004               | -0,073 to 0,081 | 0,917   |
| US flow Min ratio             | 0,148 (0,017) | OA        | 0,121 (0,034) | 0,027               | -0,048 to 0,102 | 0,481   |
|                               |               | PsO       | 0,196 (0,037) | -0,049              | -0,129 to 0,032 | 0,231   |
|                               |               | Healthy   | 0,147 (0,022) | 0,00                | -0,055 to 0,056 | 0,987   |
